# Supplementary material
Source: Research Square preprint supplement (doi:10.21203/rs.3.rs-8969323/v1)
Supplement: Supplementary file 1 [file 608bc7a329093426dfd22b45.xlsx]

## Sheet: Sheet 1
Supplementary Table 3. Clinical prioritization of signals.
Preferred Terms (PTs)	N	ROR	ROR(lower 95%Cl)	ROR(upper 95%Cl)	PRR	χ2	EBGM	EBGM05	IC	IC025	Death number	Death rate	Total score	Priority
Eye pain	120	44.29	36.9	53.15	42.73	4882.36	42.63	36.59	5.41	5.15	0	0	3	Medium Priority
Vision blurred	98	13.86	11.34	16.95	13.48	1134.19	13.47	11.39	3.75	3.46	0	0	3	Medium Priority
Drug ineffective	97	1.38	1.13	1.69	1.37	9.9	1.37	1.16	0.45	0.16	0	0	2	Low Priority
Ocular hyperaemia	95	40.79	33.26	50.03	39.66	3574.28	39.57	33.35	5.31	5.01	0	0	3	Medium Priority
Eye irritation	88	33.17	26.83	41	32.32	2668.11	32.26	27.02	5.01	4.7	0	0	3	Medium Priority
Intraocular pressure increased	63	92.08	71.72	118.23	90.36	5539.54	89.89	72.93	6.49	6.13	0	0	3	Medium Priority
Visual impairment	54	8.05	6.15	10.53	7.94	327.88	7.93	6.33	2.99	2.6	0	0	3	Medium Priority
Hypersensitivity	49	4.97	3.75	6.6	4.92	153.27	4.91	3.88	2.3	1.89	0	0	3	Medium Priority
Headache	49	1.46	1.1	1.93	1.45	6.88	1.45	1.14	0.53	0.12	0	0	2	Low Priority
Eye swelling	45	23.21	17.29	31.16	22.91	942.37	22.88	17.89	4.52	4.09	0	0	3	Medium Priority
Photophobia	44	45.62	33.87	61.44	45.03	1889.77	44.91	35.01	5.49	5.06	0	0	3	Medium Priority
Visual acuity reduced	38	20.39	14.81	28.08	20.17	691.95	20.15	15.42	4.33	3.87	0	0	3	Medium Priority
Eye pruritus	38	23.44	17.02	32.27	23.18	805.79	23.15	17.71	4.53	4.07	0	0	3	Medium Priority
Conjunctival hyperaemia	37	196.92	142.16	272.77	194.75	7051.85	192.56	146.61	7.59	7.12	0	0	3	Medium Priority
Ocular hypertension	36	374.55	268.75	522	370.52	12985.3	362.67	274.72	8.5	8.02	0	0	4	Medium Priority
Glaucoma	32	31.03	21.9	43.96	30.74	919.33	30.69	22.92	4.94	4.43	0	0	3	Medium Priority
Lacrimation increased	32	20.9	14.75	29.6	20.71	599.66	20.68	15.45	4.37	3.87	0	0	2	Low Priority
Condition aggravated	32	2.04	1.44	2.89	2.03	16.88	2.03	1.52	1.02	0.52	2	0.0625	2	Low Priority
Endophthalmitis	31	97.9	68.67	139.57	97	2928.89	96.46	71.69	6.59	6.08	0	0	3	Medium Priority
Cataract	28	9	6.2	13.05	8.93	197.26	8.93	6.54	3.16	2.62	0	0	3	Medium Priority
Eye disorder	27	15.58	10.67	22.76	15.47	365.18	15.45	11.25	3.95	3.4	2	0.0740741	2	Low Priority
Product use in unapproved indication	27	2.21	1.52	3.23	2.2	17.83	2.2	1.61	1.14	0.59	2	0.0740741	2	Low Priority
Corneal opacity	25	353.97	237.88	526.74	351.33	8557.45	344.27	246.86	8.43	7.85	0	0	3	Medium Priority
Product quality issue	25	3.35	2.26	4.97	3.33	40.9	3.33	2.4	1.74	1.17	0	0	2	Low Priority
Erythema	23	2.03	1.34	3.05	2.02	11.85	2.02	1.43	1.01	0.42	0	0	2	Low Priority
Ocular discomfort	23	43.98	29.17	66.32	43.69	957.07	43.58	30.91	5.45	4.85	0	0	2	Low Priority
Eye inflammation	21	43.74	28.47	67.22	43.47	869.34	43.37	30.27	5.44	4.82	0	0	2	Low Priority
Dry eye	20	8.4	5.41	13.03	8.35	129.47	8.35	5.78	3.06	2.43	0	0	2	Low Priority
Eyelid oedema	19	29.13	18.55	45.74	28.97	512.29	28.92	19.82	4.85	4.21	0	0	2	Low Priority
Uveitis	18	25.67	16.15	40.81	25.54	423.84	25.5	17.3	4.67	4.01	0	0	3	Medium Priority
Eye discharge	17	32.8	20.36	52.85	32.64	520.43	32.58	21.85	5.03	4.34	0	0	2	Low Priority
Keratitis	17	109.35	67.79	176.38	108.8	1804.29	108.11	72.47	6.76	6.07	0	0	2	Low Priority
Tinnitus	16	6.43	3.93	10.51	6.4	72.98	6.4	4.24	2.68	1.98	1	0.0625	2	Low Priority
Corneal oedema	16	131.59	80.37	215.46	130.97	2047.94	129.98	86.04	7.02	6.32	0	0	2	Low Priority
Erythema of eyelid	16	58.1	35.53	95.04	57.83	890.63	57.64	38.19	5.85	5.15	0	0	2	Low Priority
Conjunctivitis	16	16.44	10.06	26.87	16.36	230.66	16.35	10.84	4.03	3.33	0	0	2	Low Priority
Blood pressure increased	16	1.93	1.18	3.15	1.93	7.13	1.93	1.28	0.95	0.24	0	0	1	Low Priority
Corneal exfoliation	15	3430.35	1968.45	5977.93	3414.94	42661.8	2845.95	1788.12	11.47	10.69	0	0	3	Medium Priority
Foreign body sensation in eyes	15	46.76	28.14	77.7	46.55	666.82	46.43	30.35	5.54	4.81	0	0	2	Low Priority
Swelling of eyelid	15	52.61	31.65	87.43	52.38	753.68	52.22	34.14	5.71	4.98	0	0	2	Low Priority
Swelling face	14	4.02	2.38	6.79	4.01	31.59	4	2.58	2	1.25	0	0	2	Low Priority
Ulcerative keratitis	13	88.46	51.24	152.72	88.12	1113.99	87.67	55.52	6.45	5.68	0	0	3	Medium Priority
Dysgeusia	13	3.14	1.82	5.42	3.14	18.93	3.14	1.99	1.65	0.88	0	0	2	Low Priority
Dacryostenosis acquired	13	186.78	108.02	322.97	186.06	2367.12	184.07	116.41	7.52	6.75	0	0	2	Low Priority
Keratic precipitates	12	561.84	315.83	999.47	559.83	6481.47	542.09	334.77	9.08	8.27	0	0	3	Medium Priority
Corneal disorder	12	101.39	57.43	179.02	101.03	1181.57	100.45	62.42	6.65	5.85	0	0	2	Low Priority
Accidental exposure to product	12	2.37	1.35	4.18	2.37	9.5	2.37	1.47	1.24	0.44	0	0	2	Low Priority
Product delivery mechanism issue	12	49.03	27.79	86.49	48.85	560.94	48.72	30.3	5.61	4.8	0	0	2	Low Priority
Toxic anterior segment syndrome	11	193.27	106.57	350.5	192.64	2073.71	190.5	115.77	7.57	6.73	0	0	3	Medium Priority
Abnormal sensation in eye	11	47.64	26.34	86.19	47.49	499.26	47.36	28.84	5.57	4.73	0	0	2	Low Priority
