# Supplementary material
Source: Research Square preprint supplement (doi:10.21203/rs.3.rs-8969323/v1)
Supplement: Supplementary file 2 [file 80b1821f27a59d4a2a327bcf.xlsx]

## Sheet: Sheet 1
Supplementary Table 1. Signal strengths of adverse events (AEs) of tobramycin/dexamethasone at the System Organ Class (SOC) level in FAERS database. An asterisk indicates a positive signal value under this algorithm. ROR, reporting odds ratio; CI, confidence interval; PRR, proportional reporting ratio; χ2, chi-squared; IC, information component;IC025, the lower limit of 95% CI of the IC; EBGM, em…
System Organ Class (SOC)	N	ROR	ROR(lower 95%Cl)	ROR(upper 95%Cl)	PRR	χ2(PRR)	EBGM	EBGM05	IC	IC025
Nervous System Disorders	137	0.46	0.39	0.55	0.49	81.13	0.49	0.42	-1.04	-1.29
Ear And Labyrinth Disorders	56	3.93	3.02	5.12	3.88	120.2	3.88	3.11	1.96	1.57
Infections And Infestations	151	0.85	0.72	1	0.86	3.75	0.86	0.75	-0.22	-0.46
Eye Disorders	1487	39.64	37.03	42.44	22.43	31019.6	22.4	21.16	4.49	4.4
Injury, Poisoning And Procedural Complications	306	0.86	0.77	0.97	0.88	6.04	0.88	0.79	-0.19	-0.36
General Disorders And Administration Site Conditions	365	0.58	0.52	0.65	0.63	97.84	0.63	0.57	-0.67	-0.83
Skin And Subcutaneous Tissue Disorders	172	0.95	0.81	1.11	0.95	0.43	0.95	0.84	-0.07	-0.3
Blood And Lymphatic System Disorders	15	0.26	0.16	0.43	0.26	31.13	0.26	0.17	-1.92	-2.64
Psychiatric Disorders	59	0.3	0.24	0.39	0.32	92.34	0.32	0.26	-1.66	-2.04
Musculoskeletal And Connective Tissue Disorders	33	0.18	0.13	0.26	0.19	120.29	0.19	0.14	-2.4	-2.89
Investigations	136	0.65	0.55	0.77	0.66	24.49	0.66	0.58	-0.59	-0.84
Renal And Urinary Disorders	12	0.19	0.11	0.33	0.19	42.21	0.19	0.12	-2.4	-3.2
Product Issues	90	1.67	1.35	2.06	1.65	23.57	1.65	1.39	0.72	0.42
Immune System Disorders	78	2.13	1.71	2.67	2.11	45.93	2.11	1.75	1.08	0.75
Gastrointestinal Disorders	102	0.34	0.28	0.41	0.36	127.18	0.36	0.3	-1.48	-1.76
Respiratory, Thoracic And Mediastinal Disorders	64	0.4	0.31	0.51	0.41	57.89	0.41	0.33	-1.3	-1.66
Metabolism And Nutrition Disorders	13	0.18	0.1	0.31	0.18	49.58	0.18	0.11	-2.47	-3.25
Cardiac Disorders	19	0.21	0.14	0.34	0.22	54.52	0.22	0.15	-2.19	-2.84
Reproductive System And Breast Disorders	4	0.14	0.05	0.36	0.14	22.08	0.14	0.06	-2.87	-4.17
Surgical And Medical Procedures	8	0.17	0.09	0.35	0.18	31.07	0.18	0.1	-2.5	-3.46
Vascular Disorders	15	0.21	0.13	0.35	0.21	45.05	0.21	0.14	-2.24	-2.96
Neoplasms Benign, Malignant And Unspecified (Incl Cysts And Polyps)	2	0.02	0.01	0.09	0.02	85.01	0.02	0.01	-5.44	-7.11
Social Circumstances	9	0.57	0.3	1.1	0.58	2.83	0.58	0.33	-0.8	-1.71
Hepatobiliary Disorders	1	0.03	0	0.23	0.03	28.98	0.03	0.01	-4.94	-6.98
Endocrine Disorders	3	0.35	0.11	1.09	0.35	3.6	0.35	0.14	-1.51	-2.95
Congenital, Familial And Genetic Disorders	1	0.1	0.01	0.68	0.1	8.55	0.1	0.02	-3.38	-5.42
