# Supplementary material
Source: Research Square preprint supplement (doi:10.21203/rs.3.rs-8969323/v1)
Supplement: Supplementary file 3 [file ac4d3533a698c93cdf2a6899.xlsx]

## Sheet: Supllementary Table 2
Supplementary Table 2. Signal strengths of different Preferred Terms (PTs) related to tobramycin/dexamethasone (Top 50 occurrences) in FAERS database. An asterisk indicates a positive signal value under this algorithm. ROR, reporting odds ratio; CI, confidence interval; PRR, proportional reporting ratio; χ2, chi-squared; IC, information component;IC025, the lower limit of 95% CI of the IC; EBGM, …
Preferred Terms (PTs)	System Organ Class (SOC)	N	ROR	ROR(lower 95%Cl)	ROR(lower 95%Cl)	PRR	χ2	EBGM	EBGM05	IC	IC025
Eye Pain	Eye Disorders	120	44.29	36.9	53.15	42.73	4882.36	42.63	36.59	5.41	5.15
Vision Blurred	Eye Disorders	98	13.86	11.34	16.95	13.48	1134.19	13.47	11.39	3.75	3.46
Ocular Hyperaemia	Eye Disorders	95	40.79	33.26	50.03	39.66	3574.28	39.57	33.35	5.31	5.01
Eye Irritation	Eye Disorders	88	33.17	26.83	41	32.32	2668.11	32.26	27.02	5.01	4.7
Intraocular Pressure Increased	Investigations	63	92.08	71.72	118.23	90.36	5539.54	89.89	72.93	6.49	6.13
Visual Impairment	Eye Disorders	54	8.05	6.15	10.53	7.94	327.88	7.93	6.33	2.99	2.6
Hypersensitivity	Immune System Disorders	49	4.97	3.75	6.6	4.92	153.27	4.91	3.88	2.3	1.89
Headache	Nervous System Disorders	49	1.46	1.1	1.93	1.45	6.88	1.45	1.14	0.53	0.12
Condition Aggravated	General Disorders And Administration Site Conditions	32	2.04	1.44	2.89	2.03	16.88	2.03	1.52	1.02	0.52
Endophthalmitis	Infections And Infestations	31	97.9	68.67	139.57	97	2928.89	96.46	71.69	6.59	6.08
Product Use In Unapproved Indication	Injury, Poisoning And Procedural Complications	27	2.21	1.52	3.23	2.2	17.83	2.2	1.61	1.14	0.59
Product Quality Issue	Product Issues	25	3.35	2.26	4.97	3.33	40.9	3.33	2.4	1.74	1.17
Erythema	Skin And Subcutaneous Tissue Disorders	23	2.03	1.34	3.05	2.02	11.85	2.02	1.43	1.01	0.42
Tinnitus	Ear And Labyrinth Disorders	16	6.43	3.93	10.51	6.4	72.98	6.4	4.24	2.68	1.98
Conjunctivitis	Infections And Infestations	16	16.44	10.06	26.87	16.36	230.66	16.35	10.84	4.03	3.33
Blood Pressure Increased	Investigations	16	1.93	1.18	3.15	1.93	7.13	1.93	1.28	0.95	0.24
Swelling Face	General Disorders And Administration Site Conditions	14	4.02	2.38	6.79	4.01	31.59	4	2.58	2	1.25
Dysgeusia	Nervous System Disorders	13	3.14	1.82	5.42	3.14	18.93	3.14	1.99	1.65	0.88
Accidental Exposure To Product	Injury, Poisoning And Procedural Complications	12	2.37	1.35	4.18	2.37	9.5	2.37	1.47	1.24	0.44
Product Delivery Mechanism Issue	Product Issues	12	49.03	27.79	86.49	48.85	560.94	48.72	30.3	5.61	4.8
Discomfort	General Disorders And Administration Site Conditions	11	3.23	1.78	5.83	3.22	16.83	3.22	1.96	1.69	0.85
Toxic Anterior Segment Syndrome	Injury, Poisoning And Procedural Complications	11	193.27	106.57	350.5	192.64	2073.71	190.5	115.77	7.57	6.73
Inflammation	General Disorders And Administration Site Conditions	10	3.71	1.99	6.9	3.7	19.72	3.7	2.2	1.89	1.02
Expired Product Administered	Injury, Poisoning And Procedural Complications	10	4.84	2.6	9	4.83	30.35	4.83	2.87	2.27	1.4
Product Packaging Quantity Issue	Product Issues	10	19.34	10.39	35.99	19.28	173.2	19.26	11.46	4.27	3.4
Eye Infection	Infections And Infestations	9	15.22	7.91	29.28	15.18	119.11	15.16	8.77	3.92	3.01
Hypopyon	Infections And Infestations	9	202.48	104.85	390.99	201.93	1778.45	199.59	115.08	7.64	6.72
Product Dispensing Error	Injury, Poisoning And Procedural Complications	9	4.54	2.36	8.74	4.53	24.78	4.53	2.62	2.18	1.27
Deafness	Ear And Labyrinth Disorders	8	5.75	2.87	11.5	5.74	31.28	5.73	3.21	2.52	1.56
Hypoacusis	Ear And Labyrinth Disorders	7	2.65	1.26	5.57	2.65	7.2	2.65	1.43	1.41	0.38
Lipogranuloma	General Disorders And Administration Site Conditions	7	3327.05	1479.55	7481.51	3320.08	19445.5	2779.76	1411.03	11.44	10.33
Ear Discomfort	Ear And Labyrinth Disorders	6	10.86	4.87	24.2	10.84	53.58	10.84	5.54	3.44	2.35
Hordeolum	Infections And Infestations	6	29.01	13.01	64.66	28.96	161.68	28.91	14.78	4.85	3.76
Product Colour Issue	Product Issues	6	23.58	10.58	52.54	23.54	129.3	23.5	12.02	4.55	3.46
Product Physical Consistency Issue	Product Issues	6	21.74	9.76	48.46	21.71	118.37	21.68	11.09	4.44	3.35
Anaphylactic Shock	Immune System Disorders	5	3.72	1.55	8.95	3.72	9.93	3.72	1.78	1.89	0.71
Deafness Unilateral	Ear And Labyrinth Disorders	4	13.54	5.08	36.12	13.53	46.37	13.52	5.95	3.76	2.46
Product Residue Present	Investigations	4	5.73	2.15	15.28	5.73	15.6	5.72	2.52	2.52	1.23
Intraocular Pressure Test Abnormal	Investigations	4	107.35	40.14	287.07	107.22	418.29	106.56	46.79	6.74	5.44
Pharyngeal Oedema	Respiratory, Thoracic And Mediastinal Disorders	4	4.46	1.67	11.88	4.45	10.71	4.45	1.96	2.15	0.86
Madarosis	Skin And Subcutaneous Tissue Disorders	4	6.04	2.27	16.12	6.04	16.81	6.04	2.66	2.59	1.3
Eosinophilia	Blood And Lymphatic System Disorders	3	3.23	1.04	10.02	3.23	4.62	3.23	1.25	1.69	0.25
Seasonal Allergy	Immune System Disorders	3	4.14	1.34	12.86	4.14	7.15	4.14	1.61	2.05	0.61
Body Temperature Decreased	Investigations	3	5.46	1.76	16.93	5.45	10.9	5.45	2.11	2.45	1
Tunnel Vision	Nervous System Disorders	3	30.21	9.73	93.82	30.19	84.51	30.13	11.68	4.91	3.47
Pharyngeal Erythema	Respiratory, Thoracic And Mediastinal Disorders	3	24.21	7.8	75.15	24.19	66.59	24.15	9.36	4.59	3.15
Toxic Skin Eruption	Skin And Subcutaneous Tissue Disorders	3	5.49	1.77	17.05	5.49	11.01	5.49	2.13	2.46	1.01
Scab	Skin And Subcutaneous Tissue Disorders	3	4.98	1.6	15.44	4.97	9.52	4.97	1.93	2.31	0.87
Impaired Driving Ability	Social Circumstances	3	4.9	1.58	15.21	4.9	9.3	4.9	1.9	2.29	0.85
Self-Medication	Surgical And Medical Procedures	3	13.75	4.43	42.68	13.74	35.41	13.73	5.32	3.78	2.33
