# Supplementary material
Source: Research Square preprint supplement (doi:10.21203/rs.3.rs-8969323/v1)
Supplement: Supplementary file 4 [file b68fe4ffc70ef1312d3a5b47.xlsx]

## Sheet: Sheet 1
Supplementary Table 4. The number of main adverse events (AEs) occurring by time groups (0-7 days and > 7-30days).
Preferred Terms (PTs)	group	N
Eye pain	0-7days	19
Vision blurred	0-7days	19
Ocular hyperaemia	0-7days	15
Ocular hypertension	0-7days	13
Eye swelling	0-7days	12
Conjunctival hyperaemia	0-7days	10
Photophobia	0-7days	10
Ocular discomfort	0-7days	10
Intraocular pressure increased	0-7days	9
Headache	0-7days	9
Dizziness	0-7days	9
Eye irritation	0-7days	9
Intraocular pressure increased	> 7-30days	8
Eye pain	> 7-30days	7
Ocular hypertension	> 7-30days	5
Vision blurred	> 7-30days	4
Ocular hyperaemia	> 7-30days	4
Headache	> 7-30days	4
Conjunctival hyperaemia	> 7-30days	3
Photophobia	> 7-30days	3
Dizziness	> 7-30days	3
Eye irritation	> 7-30days	3
Eye swelling	> 7-30days	2
